# Supplementary material
Source: publisher site journal article supplement (https://www.dovepress.com/article/261615)
Supplement: Supplementary file 1 [file get_supplementary_file.php]

**Supplementary Material A**

**Descriptive criteria for psychological instruments to be included in patient preferences studies**

| **Criteria** | **Description of criteria** | **Criterion levels** | |
| --- | --- | --- | --- |
| **Aim** | | | |
| 1. Which psychological construct relevant to patient preference studies does the instrument describe/measure? | The instrument can be placed within a psychological construct relevant to patients' preference elicitation or patients' preference measurements. | | • See Table 1 for a detailed list of psychological constructs |
| 2. Does the instrument assess psychological constructs related to participants’ ability to apprehend the attributes and levels as intended by the researcher? | The instrument measure constructs that directly influence the participants’ ability to properly apprehend a given scenario as intended by the researcher. | | • Yes  • No |
| 3. Does the instrument measure constructs that relate to preference heterogeneity? | The instrument measure constructs that may be assessed to profile patients and explain preference heterogeneity. | | • Yes  • No |
| 4. Which is the outcome measure of the instrument? | Examples of the outcome of psychological instruments can be a raw score, standard score, percentile rank, or cut-off. | | • Raw score  • Standard score  • Percentile rank  • Cut-off  • Others |
| **Population** | | | |
| 1. Is this instrument designed for a particular population? | Often psychological instruments are constructed for a specific population, and this should be taken into account when administering them using a different population. | • Yes, healthy population  • Yes, disease-specific population  • No | |
| 2. Are there revised or adapted versions of this instrument? | Often psychological measurements are adapted ore revised to be used in populations other than the one for which it has been developed. | • Yes, which?  • No | |
| 3. Does the instrument provide cut-offs distinguishing between normal and pathological results? | Some psychological instruments have clinically relevant/valid cut-off that tells us if results fall in a pathological range or in a normal range | • Clinical/pathological • Borderline  • Normal  • Other | |
| **Features** | | | |
| 1. **features related to the instrument** | | | |
| 1. Is the instrument available in different languages? | Number of languages in which the instrument is available | • Please provide list of available languages | |
| 2. Does the instrument ask respondents to focus on a specific period in their life? | For example, some psychological instruments require participants to focus on their past, others on their present or on their future. | • Yes, retrospective measure  • Yes, concurrent measure  • Yes, future-oriented measures/expectancy measures | |
| 3. Is the measure protected by copyright/license? |  | • Yes, specify • No | |
| 4. Does the instrument require graphical design? | Graphical design can be multimedia development, stylized image development, technical illustration, general image editing or access graphic files. | • Yes  • No | |
| 5. Are hypothetical scenarios/narratives required? | Some psychological instruments require participants to evaluate or choose between hypothetical scenarios/narratives presenting a story about or representation of a person in a situation. | • Yes, of which kind? • No | |
| 1. **features related to patients/participants** | | | |
| 1. Does the instrument need preparatory written/verbal instruction in order to enhance participant comprehension? | Some psychological instruments require specific knowledge or explanation of the task or other attributes included in the instrument. | • Yes, of which kind?  • No | |
| 2. What is the average time commitment required of respondents per administration? | Psychological instruments vary in their completion time, form few minutes to more than one hour | • Below 10 minutes  • 10-30 minutes  • 30 minutes-1 hour  • more than 1 hour | |
| 1. **features related to the administration of the instrument** | | | |
| 1. What is the frequency (number of times) the instrument has to be administered | Psychological instruments vary in how often they need to be completed or re-administered | • one time  • two times  • more than two times | |
| 2. If the instrument needs to be administered more than once, what is the interval between the two administrations? | When more than one administration is required, instruments may vary in the time required between two administrations | • within a day  • within a week  • two to three weeks  • one to three months  • four to six months  • seven months to one year  • more than a year | |
| 3. Does the administrator require any kind of training/certificate to use this instrument? | Often specific training or a certificate is needed to use a specific psychological instrument | • No training/certificate required  • Yes, training/certificate required. Which? | |
| **Data collection** | | | |
| 1. How are the data acquired? | Psychological instruments vary in their mode of administration | • Researcher-led survey  • Self-administered survey (paper and pen/ online survey)  • Interview  • Computerised task • Other | |
| 2. Does the data collection require the presence of the researcher? | Some psychological instruments specifically require the presence of the researcher | •Yes  •No | |
| 3. Who provides the data? | While most psychological instruments rely directly on the respondent to report his or her own behaviours, thoughts, or feelings, other instruments request that the information on the target individual is provided by a significant proxy respondent (e.g., caregivers or physicians) | • Respondents  • Proxy respondents | |
| 4. Is this an explicit or implicit measure? | Psychological instruments could be classified as implicit or explicit measures | • Explicit measure • Implicit measure | |
| 5. Is this qualitative or quantitative methodology? | Psychological instruments could adopt a qualitative method, a quantitative method or a mixed method | • Quantitative method  • Qualitative method  • Mixed method | |
| 6. What type of variables are measured? | Psychological instruments could measure different types of variables | a) Categorical:  • nominal variable • ordinal variable • dichotomous variable b) Continuous:  • interval variable • ratio variable | |
| 7. What is the response format? |  | • Rank order scale • Likert scale  • Visual analog scale or numerical rating scale  • Semantic- differential scale • Dichotomous response  • Multiple-choice response (only one choice allowed) • Multiple-choice response (all that apply allowed)  • Open-ended response  • Other please describe | |
| 8. Does the instrument provide graphical response options? | Graphic response options: e.g. Likert scale with smileys; mood barometer | • Yes, how? • No | |
| 9. Does the data collection require the use of specific software? | Some psychological instruments require specific software to administer the instrument (ie: software for implicit association test) | • Yes • No | |
| **Analysis** | | | |
| 1. Does the instrument require specific coding or organisation of data? | Some psychological instruments yield results that are descriptive in nature or that can be presented as simple counts or proportions. Other methods require statistical inference and, therefore, require specific coding, recoding or statistical methods. | • Yes, how • No | |
| **Psychometric characteristics** |  |  | |
| 1. Has the instrument's validity been established? | Validity is an essential quality of every psychological instrument. Specifically, each psychological measure must be proven to measure what it is supposed to measure, and its scores should allow to make appropriate and valid statistical inferences. | • Yes, how  • No | |

**Supplementary Material B**

**Feasibility criteria for psychological instruments to be included in patient preference studies**

| **Criteria** | **Description of criteria** | **Criterion levels** |
| --- | --- | --- |
| 1. Total cost associated with use and implementation of the instrument in this specific patient preference study | The total cost associated with the use of a psychological instrument consists of: 1) the fee that must be paid for each administration (only for copyrighted instruments); 2) cost associated with administration/data collection; 3) cost associated with administrator/education administrator; 4) cost associated with analysis and interpretation. On average, this total cost may range from few € (for non-copyrighted instruments) to 300 € (for copyrighted instruments) per administration. | • Provide amount for this PP study________ |
| 1a. Sub-question 1: Cost associated with use of the instrument in this specific patient preference study |  | • Provide amount ________ |
| 1b. Sub-question 2: Cost associated with administration/data collection in this specific patient preference study |  | • Provide amount ________ |
| 1c. Sub-question 3: Cost associated with administrator/education of administrator(s) for this specific patient preference study |  | • Provide amount ________ |
| 1d. Sub-question 4: Cost associated with analysis in this specific patient preference study |  | • Provide amount ________ |
| 2. Does the production, use or analysis of the instrument require the use of specific software? | Some psychological instruments require specific software to collect and analyse patient responses and outcomes. | • Yes, specify • No |
| 3. Does the production, use or analysis of the instrument require permission from the instrument’s developer? | Some psychological instruments require permission to collect and analyse patient responses and outcomes. | • Yes, specify • No |
| 4. Does the instrument require a computer/screen interface? | Some instruments might have a computerised version only (e.g. tapping tasks, virtual reality). | • Yes, specify also the required operational system • No |
| 5. Please think about patients in your specific study and their disease; consider the possible setting for the administration of this psychological instrument. Can the instrument be used in the typical/feasible setting for the patients you are considering? (e.g., home, clinic) |  | • Yes  • No |
| 6. Who provides the data? | While most psychological instruments rely directly on the respondent to report his or her own behaviours, thoughts, or feelings, other instruments request that the information on the target individual is provided by a significant proxy respondent (e.g., caregivers or physicians) | • PP study participants  • Proxy respondents |
| 7. What is the time needed to implement, administer and analyse the results in this specific patient preference study? |  | • provide an estimate in hour work per person |
| 8. What is the time commitment required of your patient population in this specific patient preference study? |  | • Below 10 minutes  • 10-30 minutes  • 30 minutes-1 hour  • more than 1 hour |
| 9. What is the patients’ cognitive burden or load of completing this psychological instrument in this specific patient preference study? | A task can be cognitively challenging in several different ways: hard mental operations, the verbosity of language, level of abstraction required, number of links between entities, hidden dependencies, etc. We may aim to agree on a definition and identify a cluster of relevant dimensions. We may rate them on a scale and calculate a final index. | • No cognitive burden on patients • Slight cognitive burden on patients • Moderate cognitive burden on patients • Severe cognitive burden on patients |
